# Supplementary material for: Lipid packing contributes to the confinement of caveolae to the plasma membrane
Source: eLife. 2026 Jul 6;14:RP108369. doi: 10.7554/eLife.108369 (PMC13336769; doi:10.7554/eLife.108369)
Supplement: Source data 1. [file elife-108369-data1.xlsx]

## Sheet: Raw data of Fig
Figure 1									Figure 2								Figure 5
Figure 1c			Figure 1e			Figure 1f			Figure 2b					Figure 2d			Figure 5b						Figure 5c			Figure 5e			Figure 5f
Caveolae/2µm2	Ctrl	KO	Relative track duration time	Ctrl	Dyngo-4a	Relative track displacement length	Ctrl	Dyngo-4a	Morphological ratio of caveolae	Ctrl height/width	Dyngo-4a height/width	Ctrl neck/width	Dyngo-4a neck/width	Number of internalised non-endosomal caveolae per cell	Ctrl	Dyngo-4a	Relative area difference (start an end)	0 µM	5 µM	10 µM	20 µM	30 µM	Young's modulus (kPa)	Ctrl	Dyngo-4a	GP value	Ctrl	Dyngo-4a	Relative track duration time	Ctrl	Dyngo-4a	Dyngo-4a + Chol	Dyngo-4a + Mock
	0.51	0.6		1.28783	1.26688		1.00141	0.33918		1.02326	0.845161	0.383721	0.651613		14.6667	0.533333		0.529634	0.583055	0.645374	0.390187	0.366759		0.13097	0.02706		0.083	-0.031		0.894744	1.47527	1.11598	1.32238
	0.41	0.5		1.02088	1.81221		0.987781	0.168517		0.795918	0.871212	0.387755	0.265152		10.1333	0.2		0.866692	0.462811	0.392395	0.36235	0.38439		0.03069	0.32889		0.105	0.158		0.848647	1.14803	1.12888	1.70639
	0.49	0.57		0.941272	1.21647		0.733031	0.297789		0.717105	1.12	0.203947	0.52		13.6667	0.266667		0.923297	0.621212	0.38616	0.398504	0.50521		0.23249	0.08818		0.059	0.028		0.994412	1.19069	1.02658	1.63233
	0.33	0.49		1.1684	1.21806		0.910326	0.259898		1	0.423077	0.409836	0.776923					1.34284	0.293623	0.484294	0.393566	0.385895		0.0411	0.11962		0.017	0.08		1.12884	1.45415	1.56322	0.968013
	0.37	0.43		1.06787	1.24564		1.00412	0.372677		0.974359	0.622449	0.410256	1.0102					1.33753	0.418552	0.344847	0.341921	0.399443		0.03294	0.06774		0.032	-0.003		0.999752	1.22213	0.73816	1.01254
	0.46	0.52		0.819172	0.843148		1.29247	0.250709		0.930693	0.959184	0.39604	0.94898											0.11491	0.1234		0.041	0.027		1.16161	1.18253	0.904321	1.51809
	0.36	0.48		0.79976	0.828552		0.858856	0.307575		0.733871	0.639456	0.629032	1.26531											0.02645	0.05026		-0.001	0.065		1.13842	1.90107	1.03966	1.43737
	0.56	0.6		0.966286	1.34172		0.609875	0.252733		0.810458	1.11017	0.313725	1.16102											0.06398	0.05461		0.036	-0.016		1.12583	1.39707	0.800215	1.56832
	0.6	0.42		0.977623	1.05867		1.03331	0.218015		1.21622	0.842975	0.351351	0.917355											0.02279	0.03139		0.095	0.01		0.854037	1.32185	0.94775	1.42238
	0.43	0.44		1.07286	2.31234		0.92431	0.455146		0.988372	0.565574	0.569767	1.04098											0.11528	0.02815		0.117	0.026		1.03256	1.85195	1.06931	1.6852
	0.61	0.5		0.878049	1.52621		1.22125	0.346401		1.17857	0.790323	0.380952	1.08065											0.0613	0.08794		0.173	-0.054		0.908266	1.26549	1.17776	1.55915
	0.38	0.42		0.835501	1.26731		1.42327	0.54592		0.831683	0.587156	0.306931	1.08257											0.12956	0.04396		0.107	-0.023		0.912883	1.40053	1.06896	1.76562
	0.39	0.56		0.848539	1.93524		0.672882	0.439992		0.842975	0.838983	0.347107	0.59322											0.0303	0.08674		0.126	0.023		0.949688	1.40746	1.44209	1.68695
	0.47	0.49		0.897431	2.20376		0.931641	0.641475		1.13187	0.977273	0.505495	0.295455											0.0488	0.04055		0.066	0.01		1.24814	1.36491	0.751622	1.35344
	0.46	0.46		1.05849	2.12919		1.18672	0.533093		0.908257	1.13415	0.788991	0.378049											0.05868	0.03827		0.11	-0.029		1.08365	1.53773	1.00963	1.15306
	0.61	0.47		0.823564	1.58878		1.08105			0.815534	1.02609	0.951456	0.26087											0.02728	0.06924		0.155	-0.024		0.974818	1.18256	1.18339	1.3398
	0.48	0.4		1.15838	1.87292		1.04544			1.14953	0.693694	0.35514	0.414414											0.18232	0.04573		0.112	-0.007		0.836824	1.3951	1.30594	1.7303
	0.49	0.33		0.980585	1.19051		1.24395			0.664516	1.15493	0.393548	0.732394											0.15651	0.18548		0.045	-0.013		1.03256	1.60055	1.26545	1.32765
	0.43	0.65		1.06917	2.63879		0.941535			0.897436	1.10588	0.564103	0.823529											0.31017	0.11786		0.087	-0.141		1.13577	1.52543	1.47232	1.38034
	0.61	0.38		1.01388	1.79236		0.956865			0.752294	1.08602	0.504587	0.806452											0.15117	0.24614		0.057	-0.106		1.09405	1.66228	1.17796	1.4775
	0.51	0.37		1.10996	2.24493		0.939918			0.701987	0.8	0.443709	0.96											0.11461	0.08454		0.055	0.013		0.933208	1.01694	0.907155	2.11185
	0.41	0.38		1.2045	1.90745					0.944444	0.6	0.466667	0.73913											0.08229	0.12413		0.042	-0.035		0.740976	1.18165	0.766993	1.4586
	0.59	0.67		1.08853	2.25984					0.753425	0.768519	0.424658	0.287037											0.26424	0.11672		0.016	-0.08		0.863132	1.92787	0.909432	1.83229
				1.01927	1.6607					0.673611	0.912088	0.409722	0.703297											0.14028	0.09319		0.034	-0.109		1.10719	1.3667	0.958915	1.7227
				1.14042	3.25294					1.10989	0.681319	0.340659	1.32967											0.04428	0.06583		0.045	-0.085		1.16379	1.17731	0.962003	1.62463
				0.751199	2.12218					0.847458	0.581967	0.601695	0.901639											0.09744	0.08669		0.029	-0.118		0.964317	1.80298	1.24687	1.04641
				0.985032	2.84986					0.827586	1.01754	1.06897	0.377193											0.11878	0.0604		0.007			0.922152	1.25008	1.09233	1.79541
				0.887607	2.2863					0.673469	1.18182	0.94898	0.603306											0.1909	0.06788		0.023			0.961933	1.2382	0.984294
				1.15649	1.95955					1.44776	1.13158	0.537313	0.934211											0.18127	0.07349		0.045			1.03424	1.13848	0.781017
				0.80858	2.74498					1.24528	1.02273	0.273585	0.704545											0.12613	0.04382					0.957904	1.29616	0.8512
				1.099	1.80467					1.15385	0.747253	0.373626	0.769231											0.09115	0.062					0.907557	1.42505	0.973403
				0.941622	1.93097					0.84375	0.494845	1.1875	0.907216												0.03872					1.05892	1.37171	1.20437
				1.12225						1.05747	0.674603	0.471264	0.952381												0.03855					0.887128	1.46382	1.01182
										0.917355	1.48837	0.404959	0.674419																	1.14205	1.94906	1.31725
										1.02703	1.07792	0.189189	1.36364																		1.30599	0.732431
										0.806723	0.983051	0.411765	0.584746																			0.876347
										0.918033	0.902439	0.540984	0.569106																			1.05313
										1.67143	0.93617	0.328571	0.861702																			0.725266
										0.66129	1.00943	0.467742	0.471698																			0.992423
										0.785124	1.02857	0.61157	0.514286																			0.930973
										1.18644	0.8	0.313559	0.818182																			1.17925
										0.944954	0.718182	0.366972	0.518182																			0.694117
										0.573171	0.977778	0.993902	0.3																			0.861622
										0.990291	0.79	0.446602	0.73																			1.6782
										0.940171	0.727273	0.786325	0.545455																			1.16841
										1.24272	0.813725	0.339806	0.72549																			0.714133
										0.87395	0.88	0.352941	0.69
										1.11268	0.943548	0.492958	0.919355
										1.04098	1.16176	0.278689	0.536765
										0.972973	0.65942	1.0991	0.362319
										0.941176	0.894737	0.294118	1.06015
										1.23809	1.0431	0.511905	1.2931
										0.830357	0.618705	0.419643	0.683453
										0.674797	0.75	0.317073	0.985714
										0.785714	1.67619	0.160714	0.352381
										0.949367	1.14094	0.265823	0.389262
										1.09231	1.03774	0.338462	0.216981
										0.989247	1.21176	0.27957	0.329412
										0.656	0.779528	0.288	0.15748
										0.590909	0.826923	0.233766	0.625
										0.969697	0.9	0.234848	0.336364
										0.886957	0.95122	0.243478	0.304878
										1.11765	0.882883	0.215686	0.54955
										1.2037	0.876404	0.407407	0.52809
										1.26437	0.795181	0.45977	0.156627
											0.771186		0.398305
											1.11539		0.24359
											1.15686		0.382353
											0.746667		0.22
											0.842975		0.239669
											0.560694		0.421965
											0.1875		0.789063
											1.02		0.27
											1.22785		0.481013
											0.282353		0.4
											1.23469		0.346939
											0.94		0.54
											0.969697		0.515152
											0.847826		0.362319
											1.27059		0.447059
											1		0.298077
											0.985294		0.279412
											0.886792		0.386792
											0.855556		0.355556

## Sheet: Raw data of Fig.S
Figure S5
Figure S5e
Relative track duration time	Ctrl	Dyngo-4a	Dyngo-4a +Laurdan
	1.08068	1.98935	2.18723
	1.07666	2.17556	1.65929
	0.977455	1.51555	1.59468
	0.858206	2.14212	1.98889
	0.896705	1.44792	1.7971
	1.20641	1.27471	1.92405
	1.07711	1.68757	1.51378
	0.858424	1.45317	1.70162
	0.943781	1.79855	1.75482
	1.07189	1.91021	1.52517
	0.803233	1.20763	1.35628
	1.15047	1.79346	1.85759
	0.931352	1.79731	2.1924
	0.849244	1.62398	2.16709
	1.03037	1.49892	1.53995
	1.09526	2.13495	1.49227
	1.0492	1.64432	2.04015
	1.04354	1.93449	1.77525
